**eTable 1.**

Participant-Reported Use of Cointerventions and Pain-Relieving Medication During the Trial<sup>a</sup>

| Additional Intervention                | 0–6 Weeks                      |                                | 7–12 Weeks                     |                                |
|----------------------------------------|--------------------------------|--------------------------------|--------------------------------|--------------------------------|
|                                        | Real Dry Needling Group (n=41) | Sham Dry Needling Group (n=43) | Real Dry Needling Group (n=41) | Sham Dry Needling Group (n=43) |
| Podiatry                               | 2 (4.8)                        | 2 (4.6)                        | 4 (9.7)                        | 5 (11.6)                       |
| Physical therapy                       | 2 (4.8)                        | 0 (0.0)                        | 0 (0.0)                        | 1 (2.3)                        |
| Cortisone injection                    | 0 (0.0)                        | 0 (0.0)                        | 1 (2.4)                        | 3 (6.9)                        |
| Extracorporeal shock wave therapy      | 0 (0.0)                        | 0 (0.0)                        | 1 (2.4)                        | 1 (2.3)                        |
| Pain-relieving medication <sup>b</sup> |                                |                                |                                |                                |
| Over-the-counter                       | 1 (2.4)                        | 1 (2.3)                        | 0 (0.0)                        | 1 (2.3)                        |
| Prescription drugs                     | 0 (0.0)                        | 1 (2.3)                        | 0 (0.0)                        | 0 (0.0)                        |

<sup>a</sup> Data are expressed as number (%). Some participants used more than one cointervention.

<sup>b</sup> Analgesics and steroidal and nonsteroidal anti-inflammatory drugs.

**eTable 2.**

Assessments of Treatment Expectancy and Rationale Credibility Recorded After the First Treatment<sup>a</sup>

| Question of Treatment Expectancy and Rationale Credibility                                                             | Real Dry Needling Group | Sham Dry Needling Group | Mean Difference (95% CI) | P    |
|------------------------------------------------------------------------------------------------------------------------|-------------------------|-------------------------|--------------------------|------|
| At this point, how logical does this treatment offered to you seem?                                                    | 6.8 (1.4)               | 6.9 (1.5)               | −0.1 (−0.7 to 0.6)       | .841 |
| At this point, how successfully do you think this treatment will be in reducing your heel pain?                        | 6.7 (1.4)               | 6.5 (1.1)               | 0.3 (−0.3 to 0.8)        | .344 |
| How confident would you be in recommending this treatment to a friend who experiences similar problems?                | 6.9 (1.2)               | 7.0 (1.1)               | −0.1 (−0.6 to 0.4)       | .702 |
| By the end of the treatment, how much improvement in your heel pain do you think will occur? <sup>b</sup>              | 6.9 (1.2)               | 7.0 (1.1)               | −0.1 (−0.6 to 0.4)       | .715 |
| At this point, how much do you really feel that the treatment will help you to reduce your heel pain?                  | 6.6 (1.6)               | 6.5 (1.3)               | 0.2 (−0.5 to 0.8)        | .601 |
| By the end of the treatment period, how much improvement in your heel pain do you really feel will occur? <sup>b</sup> | 6.3 (1.9)               | 6.6 (1.8)               | −0.1 (−1.0 to 0.7)       | .727 |

<sup>a</sup> Data are expressed as mean (SD). The Credibility/Expectancy Questionnaire (CEQ) was used to evaluate the therapy credibility (0=“not credible,” 10=“very credible”) and participant expectancy for improvement (0%=0% expectation of improvement, 100%=full improvement”). 95% CI=confidence interval.

<sup>b</sup> Question relating to participant expectations.
